# Supplementary material for: Spatiotemporal Variability of Regional Rainfall Frequencies in South Korea for Different Periods
Source: MDPI journal article supplement (doi:10.3390/su152416646), 2023-12-07
Supplement: s1 [file s1]

# Supplementary Materials

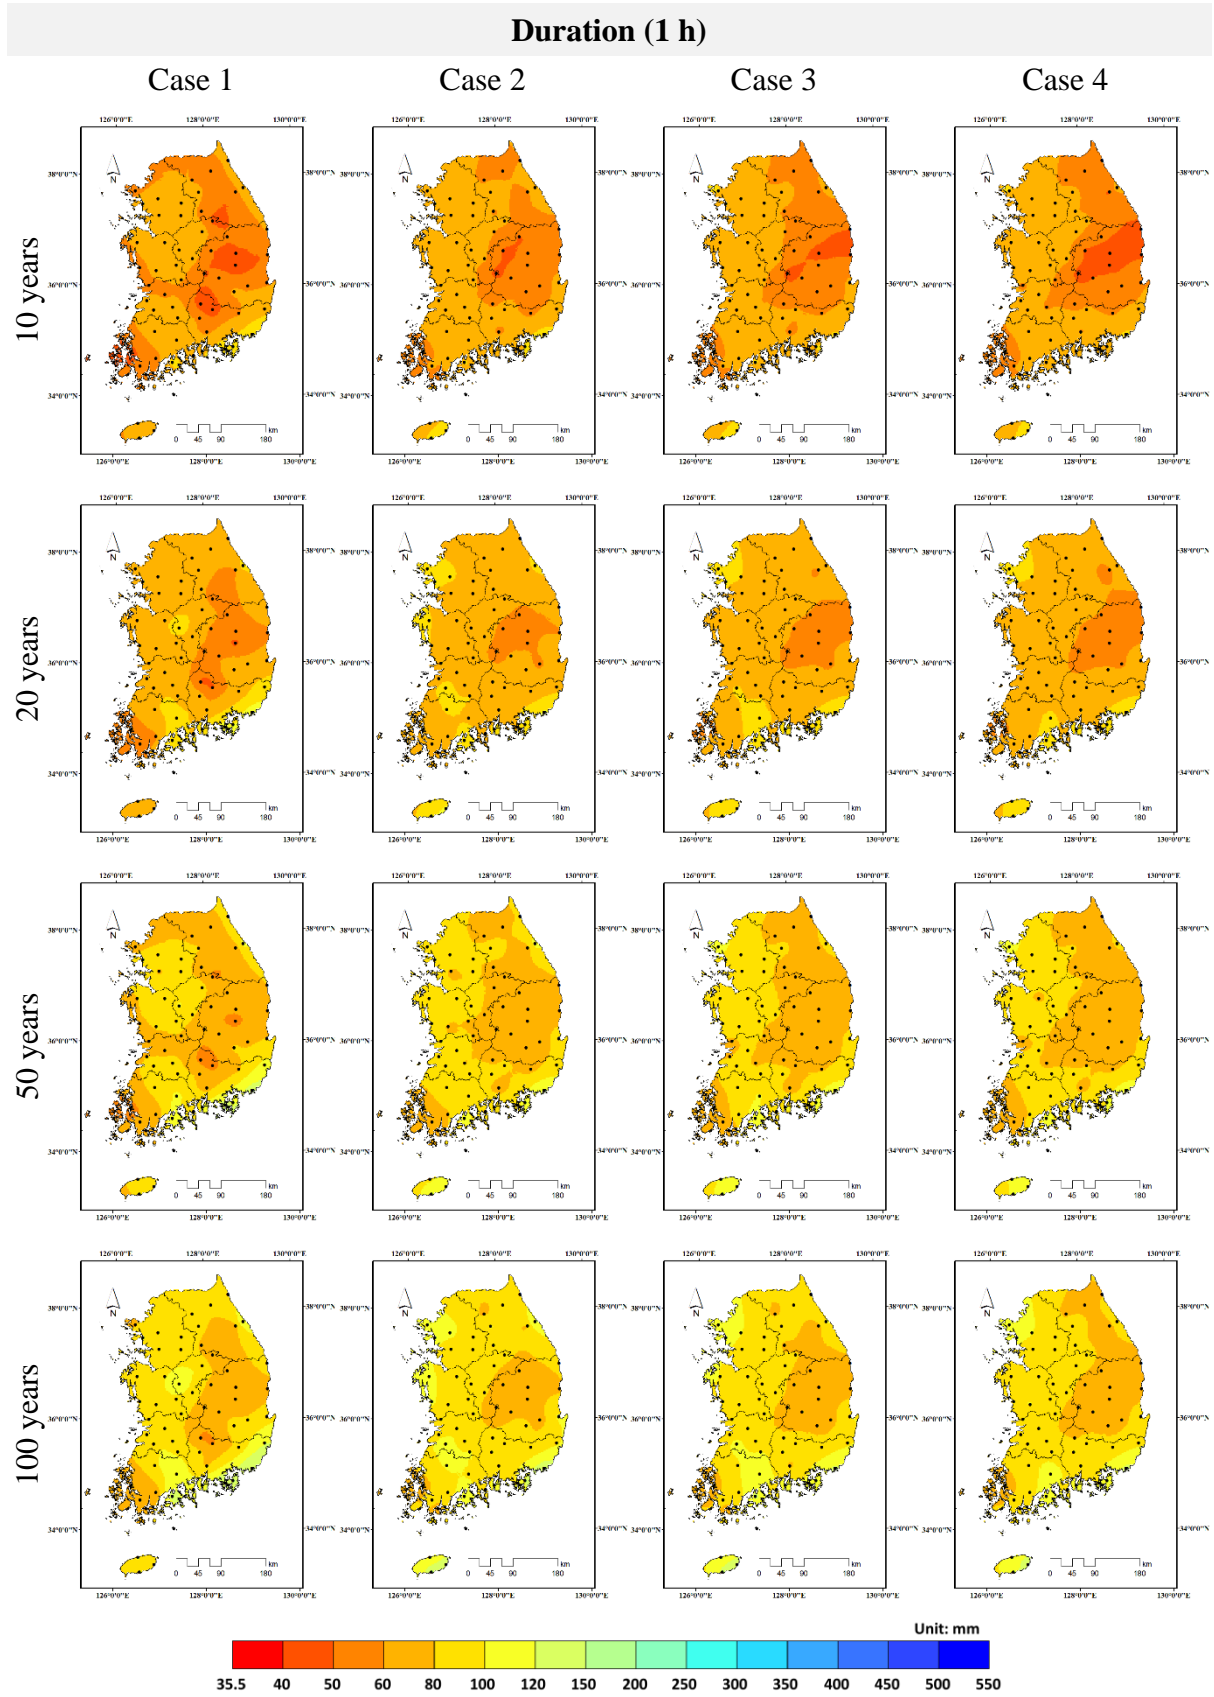

**Figure S1.** Spatial distribution of the 1 hour rainfall probability based on different return periods and observed rainfall periods.

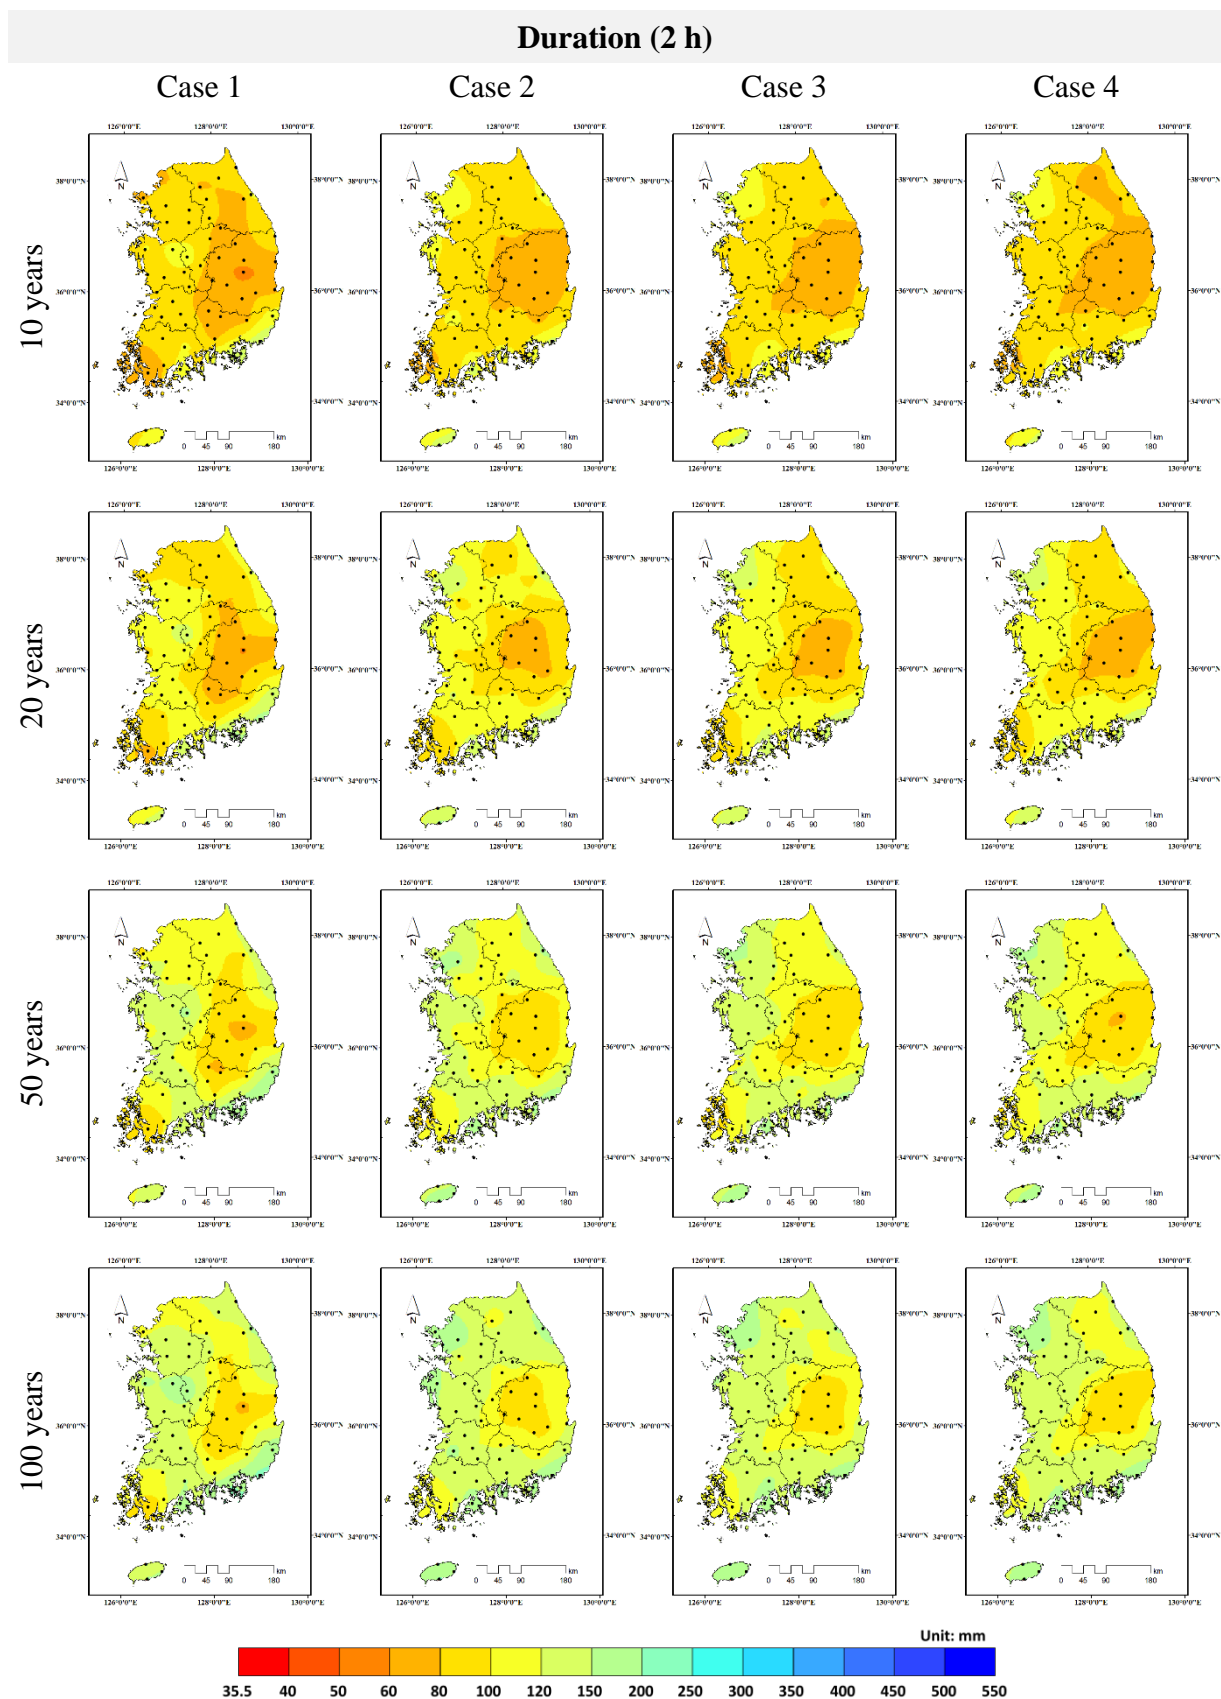

**Figure S2.** Spatial distribution of the 2 hour rainfall probability based on different return periods and observed rainfall periods.

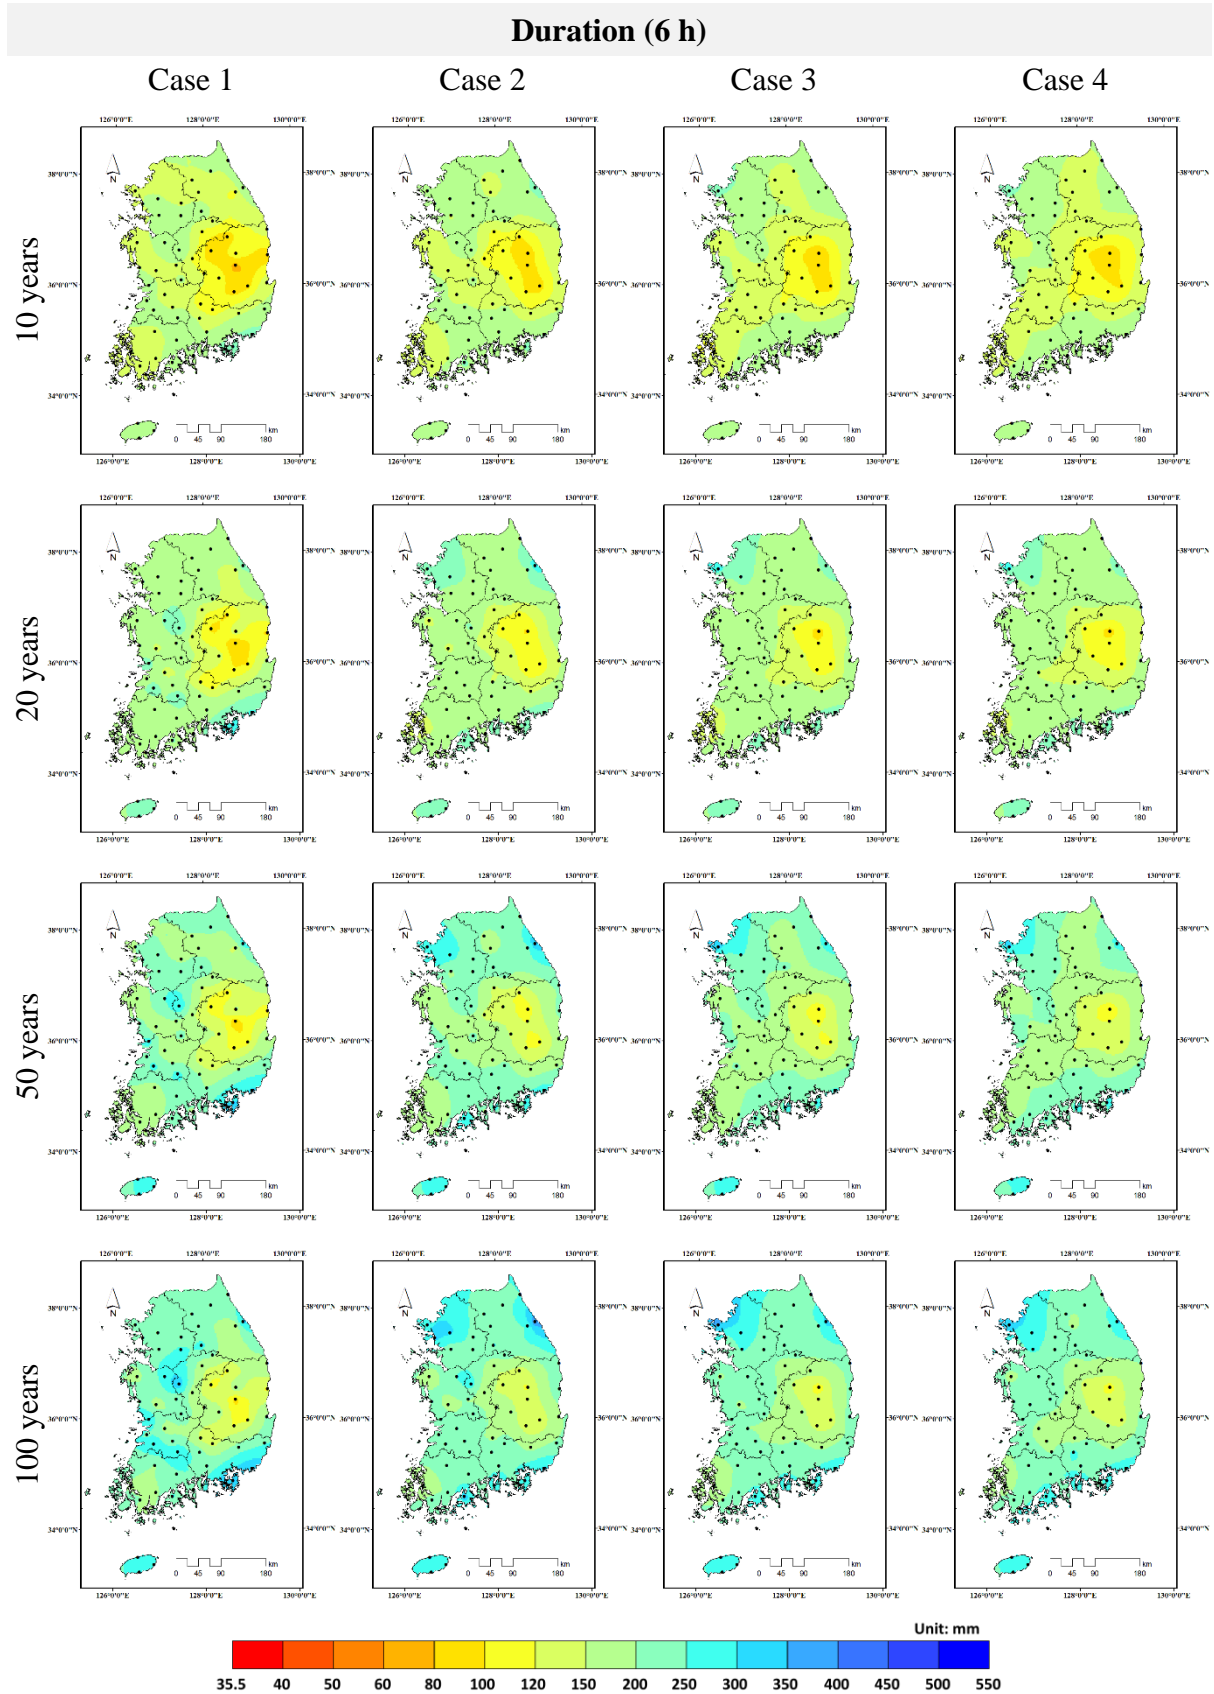

**Figure S3.** Spatial distribution of the 6 hour rainfall probability based on different return periods and observed rainfall periods.

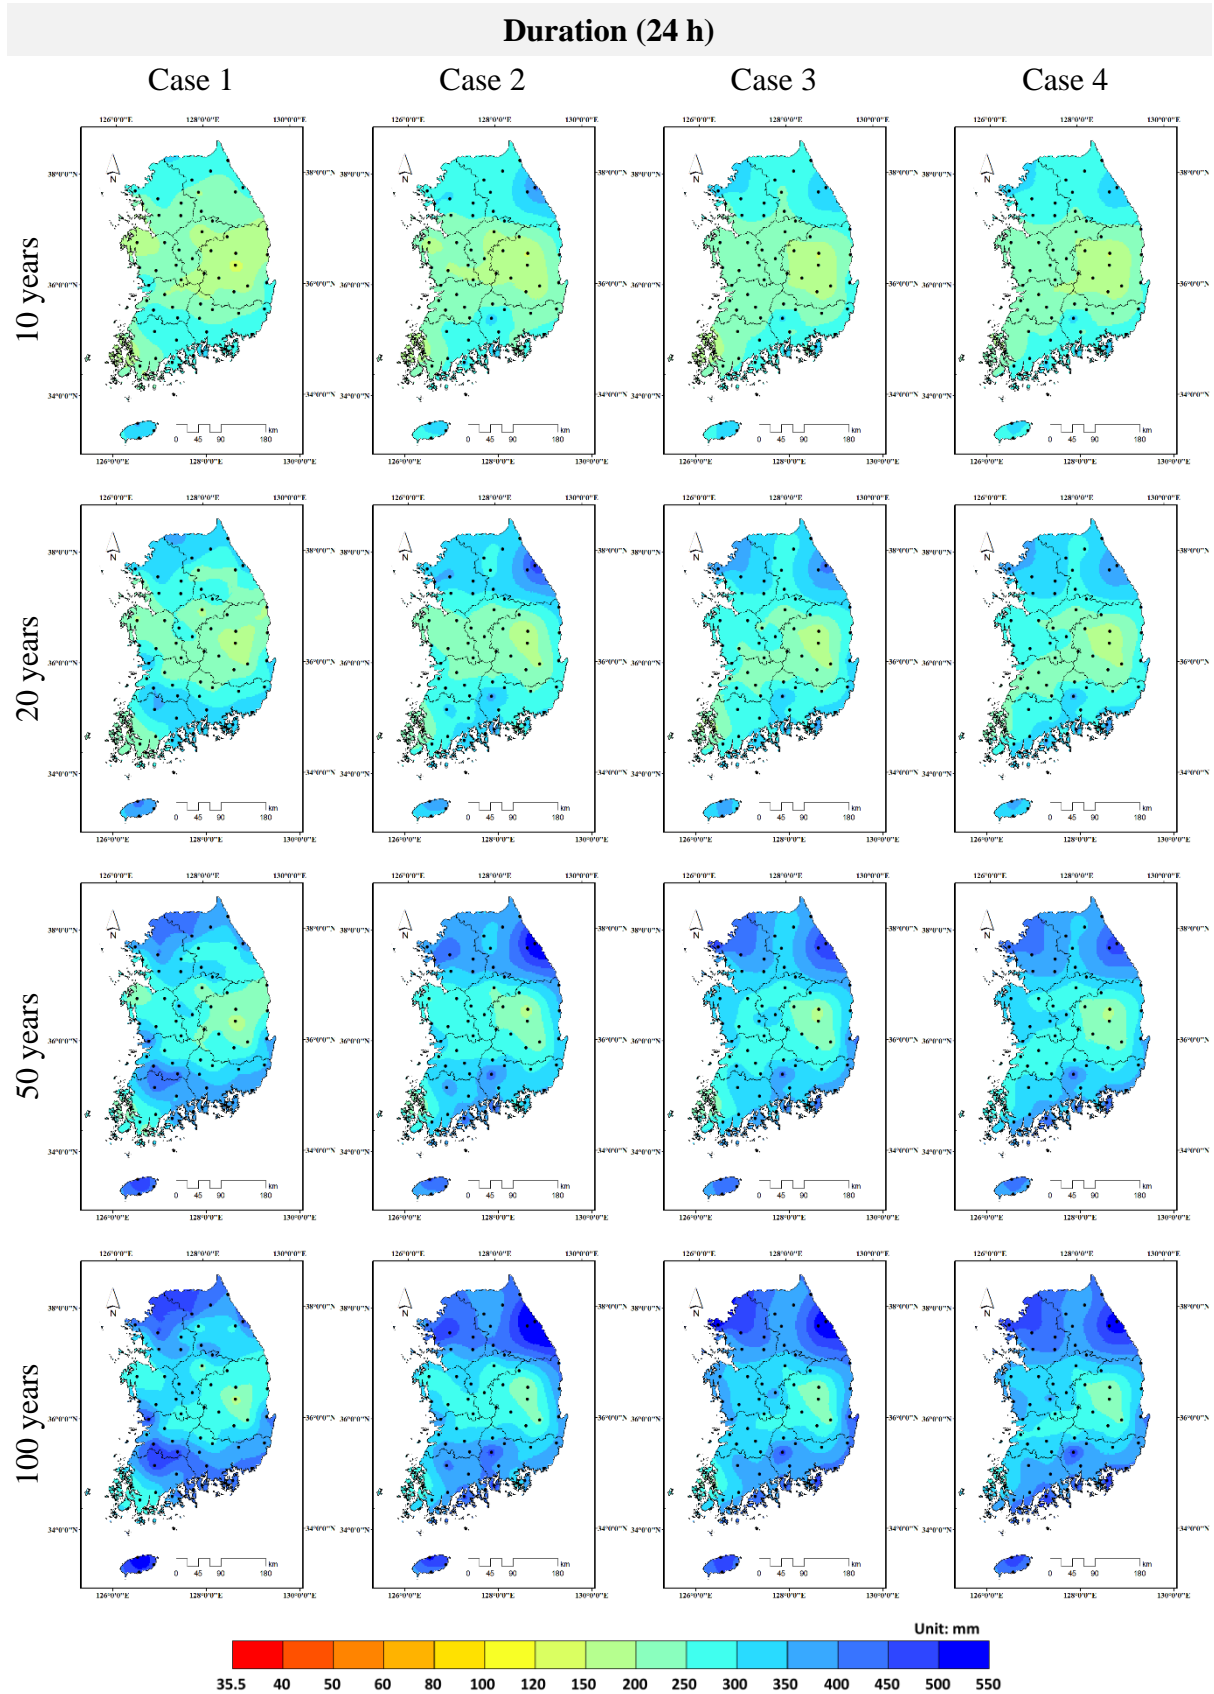

**Figure S4.** Spatial distribution of the 24 hour rainfall probability based on different return periods and observed rainfall periods.

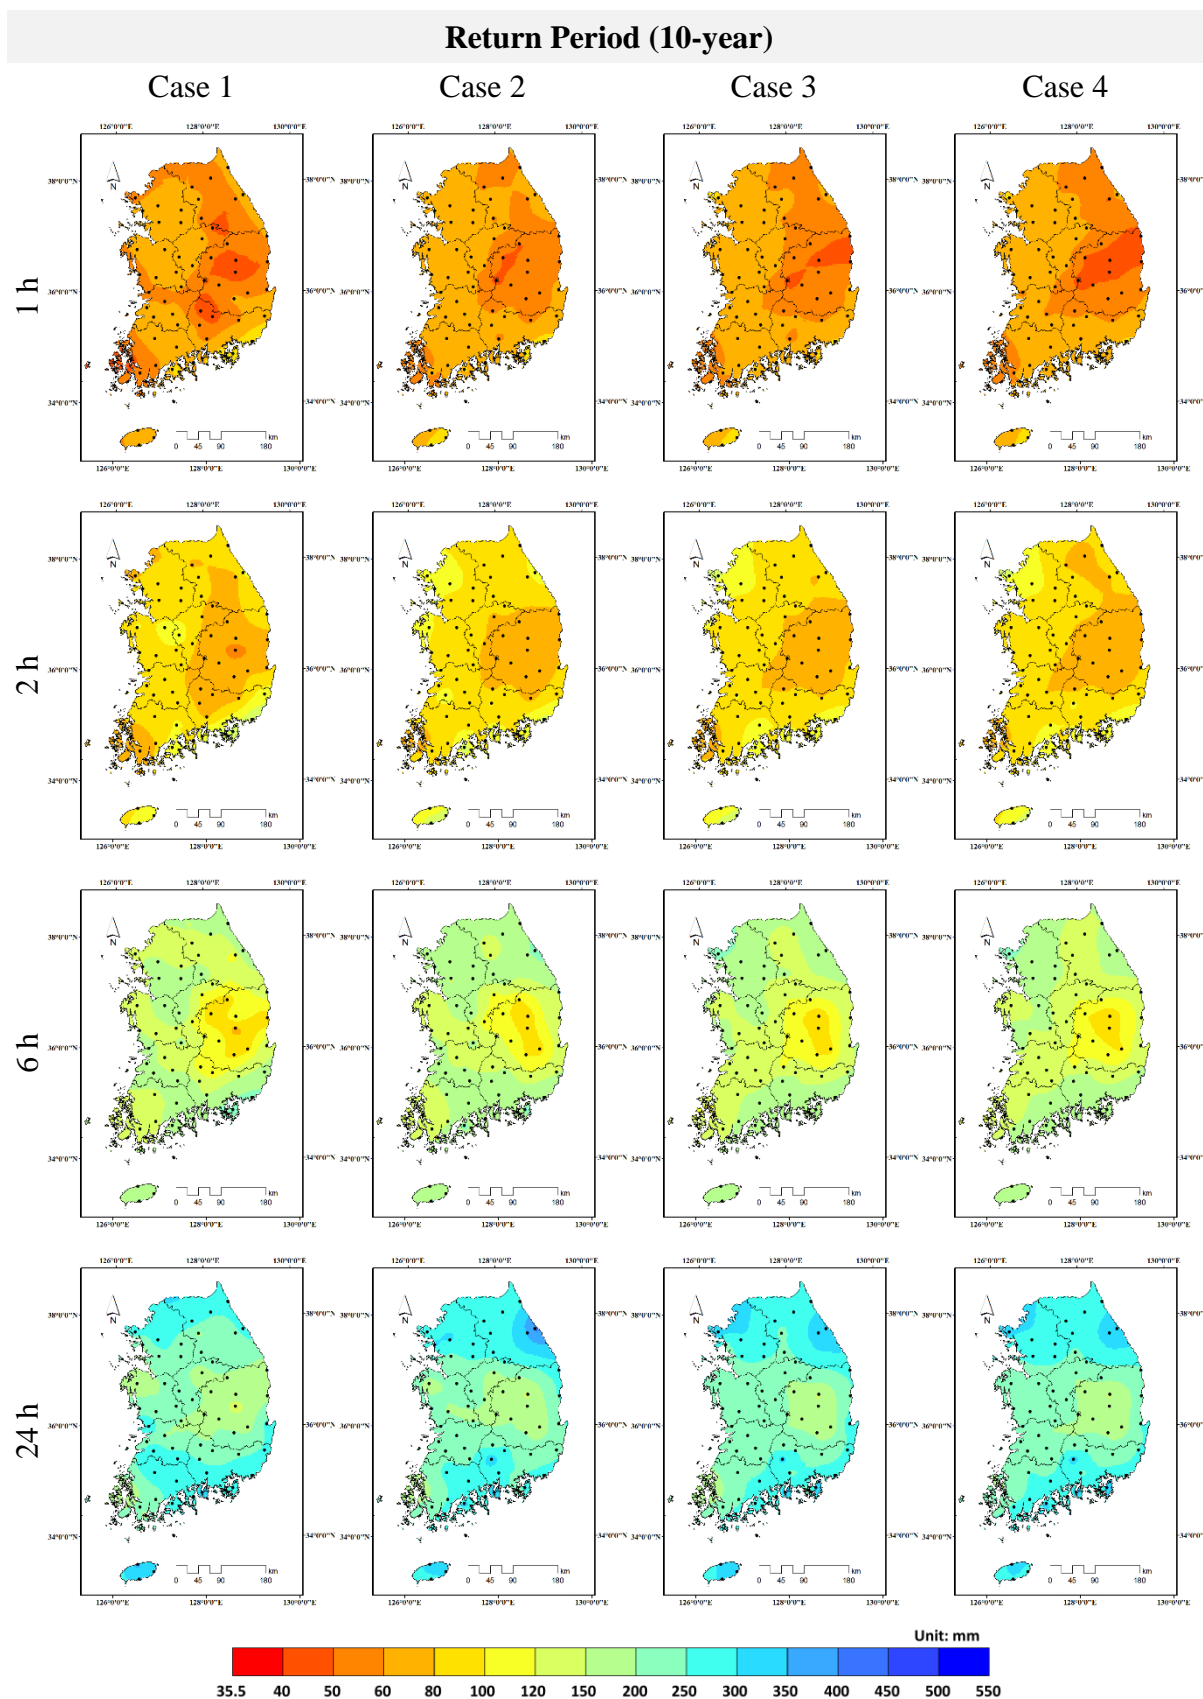

**Figure S5.** Spatial distribution of the 10 year return period based on different durations and observed rainfall periods.

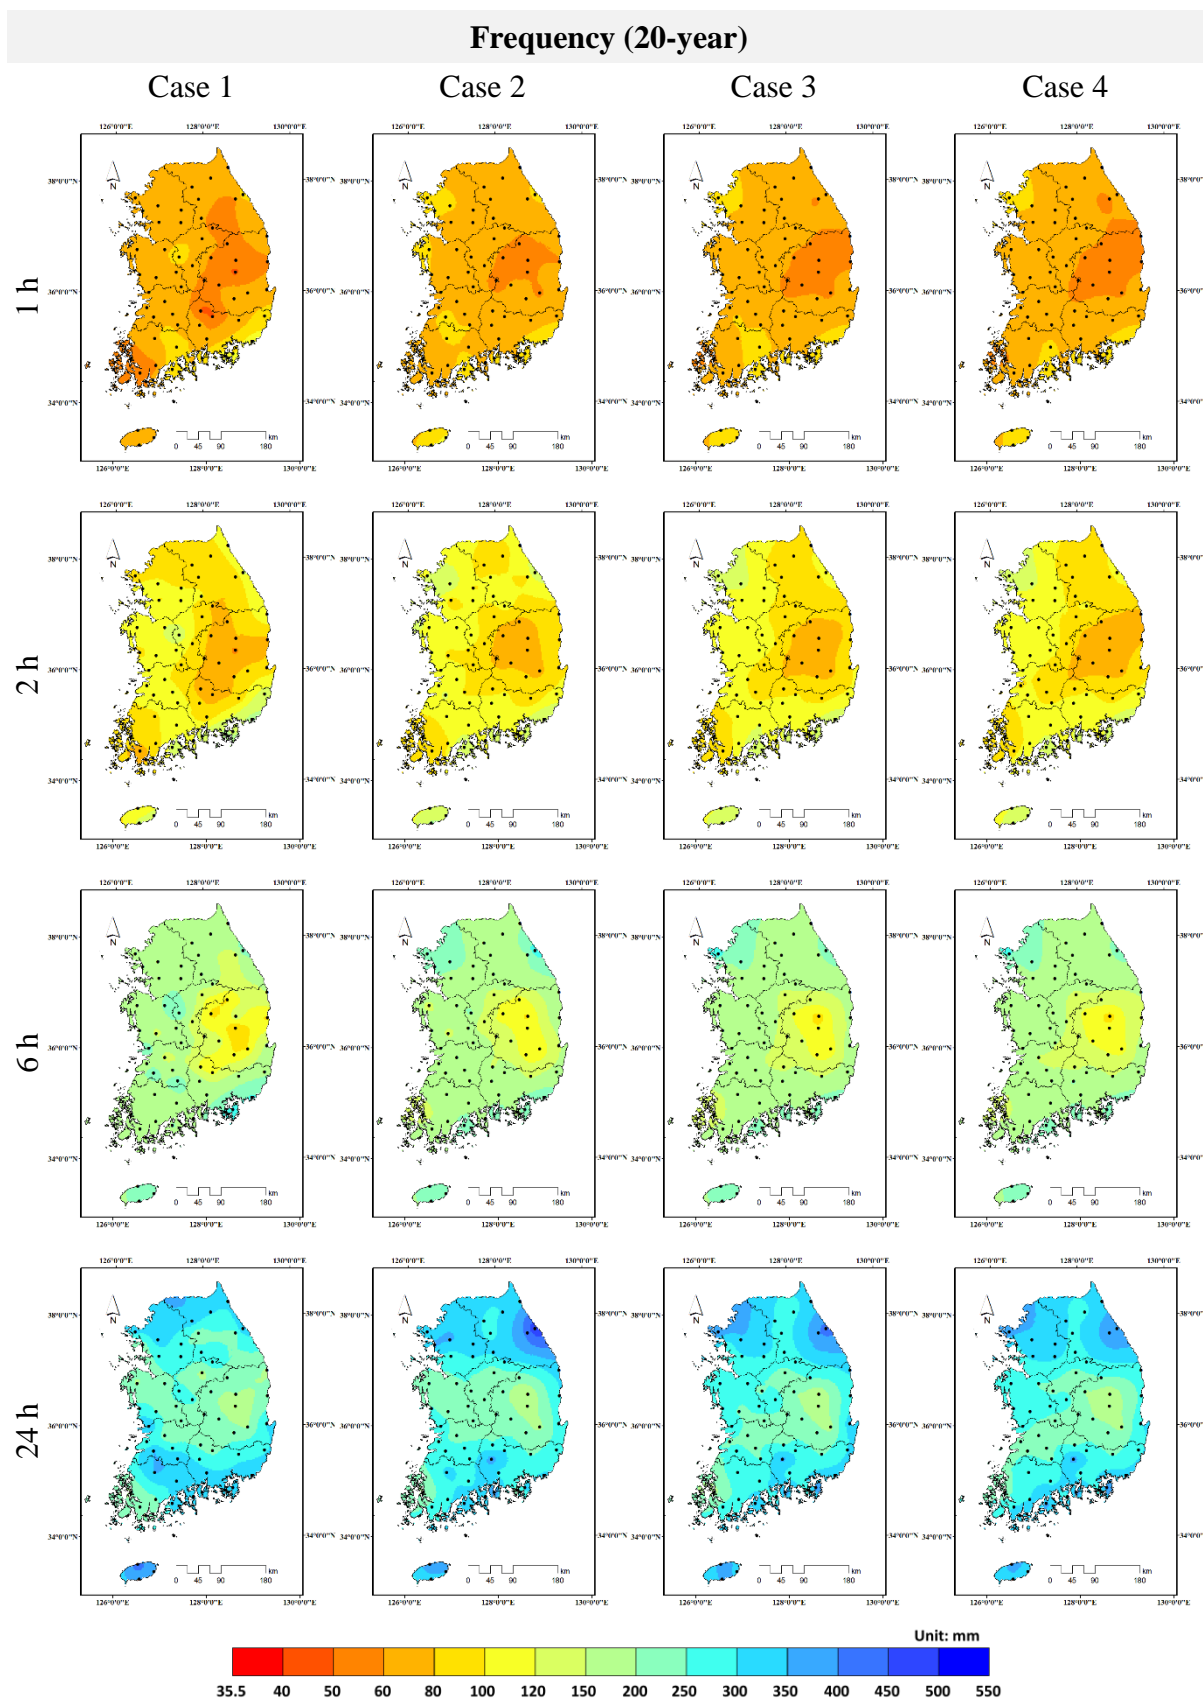

**Figure S6.** Spatial distribution of the 20 year return period based on different durations and observed rainfall periods.

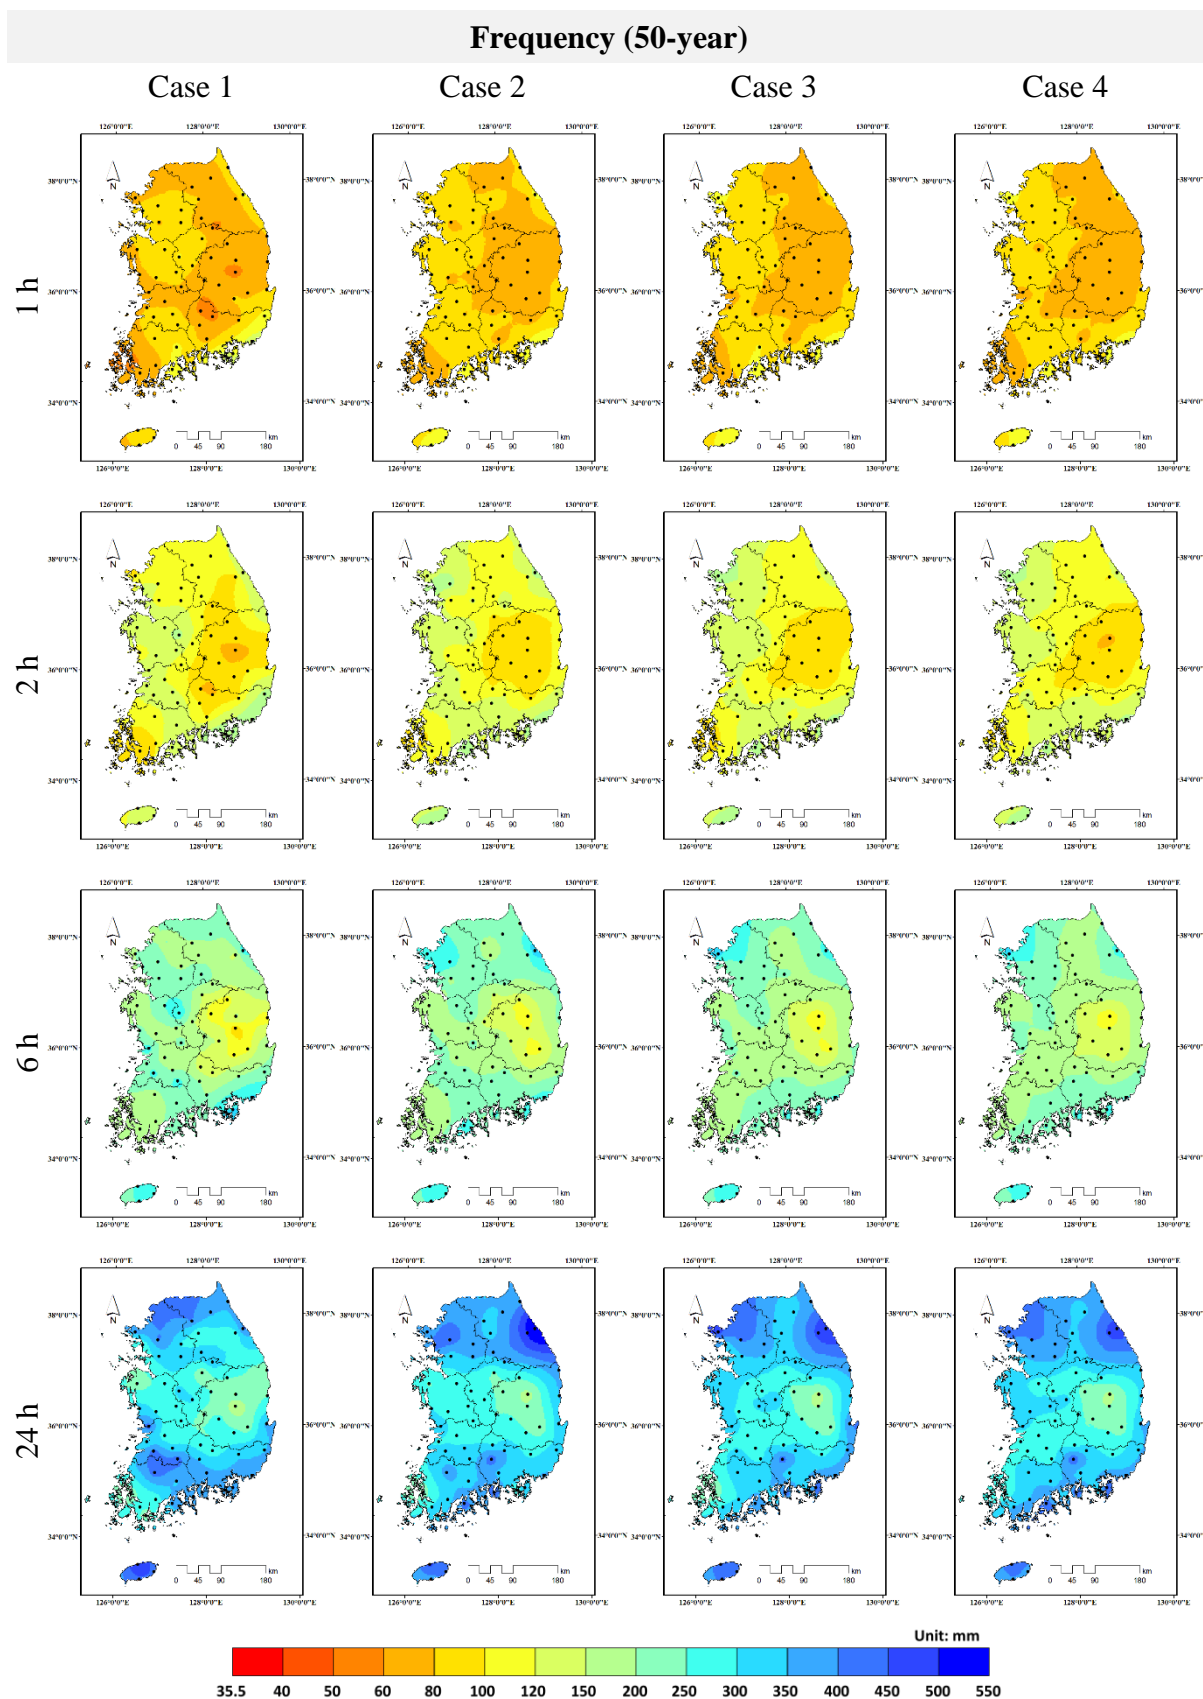

**Figure S7.** Spatial distribution of the 50 year return period based on different durations and observed rainfall periods.



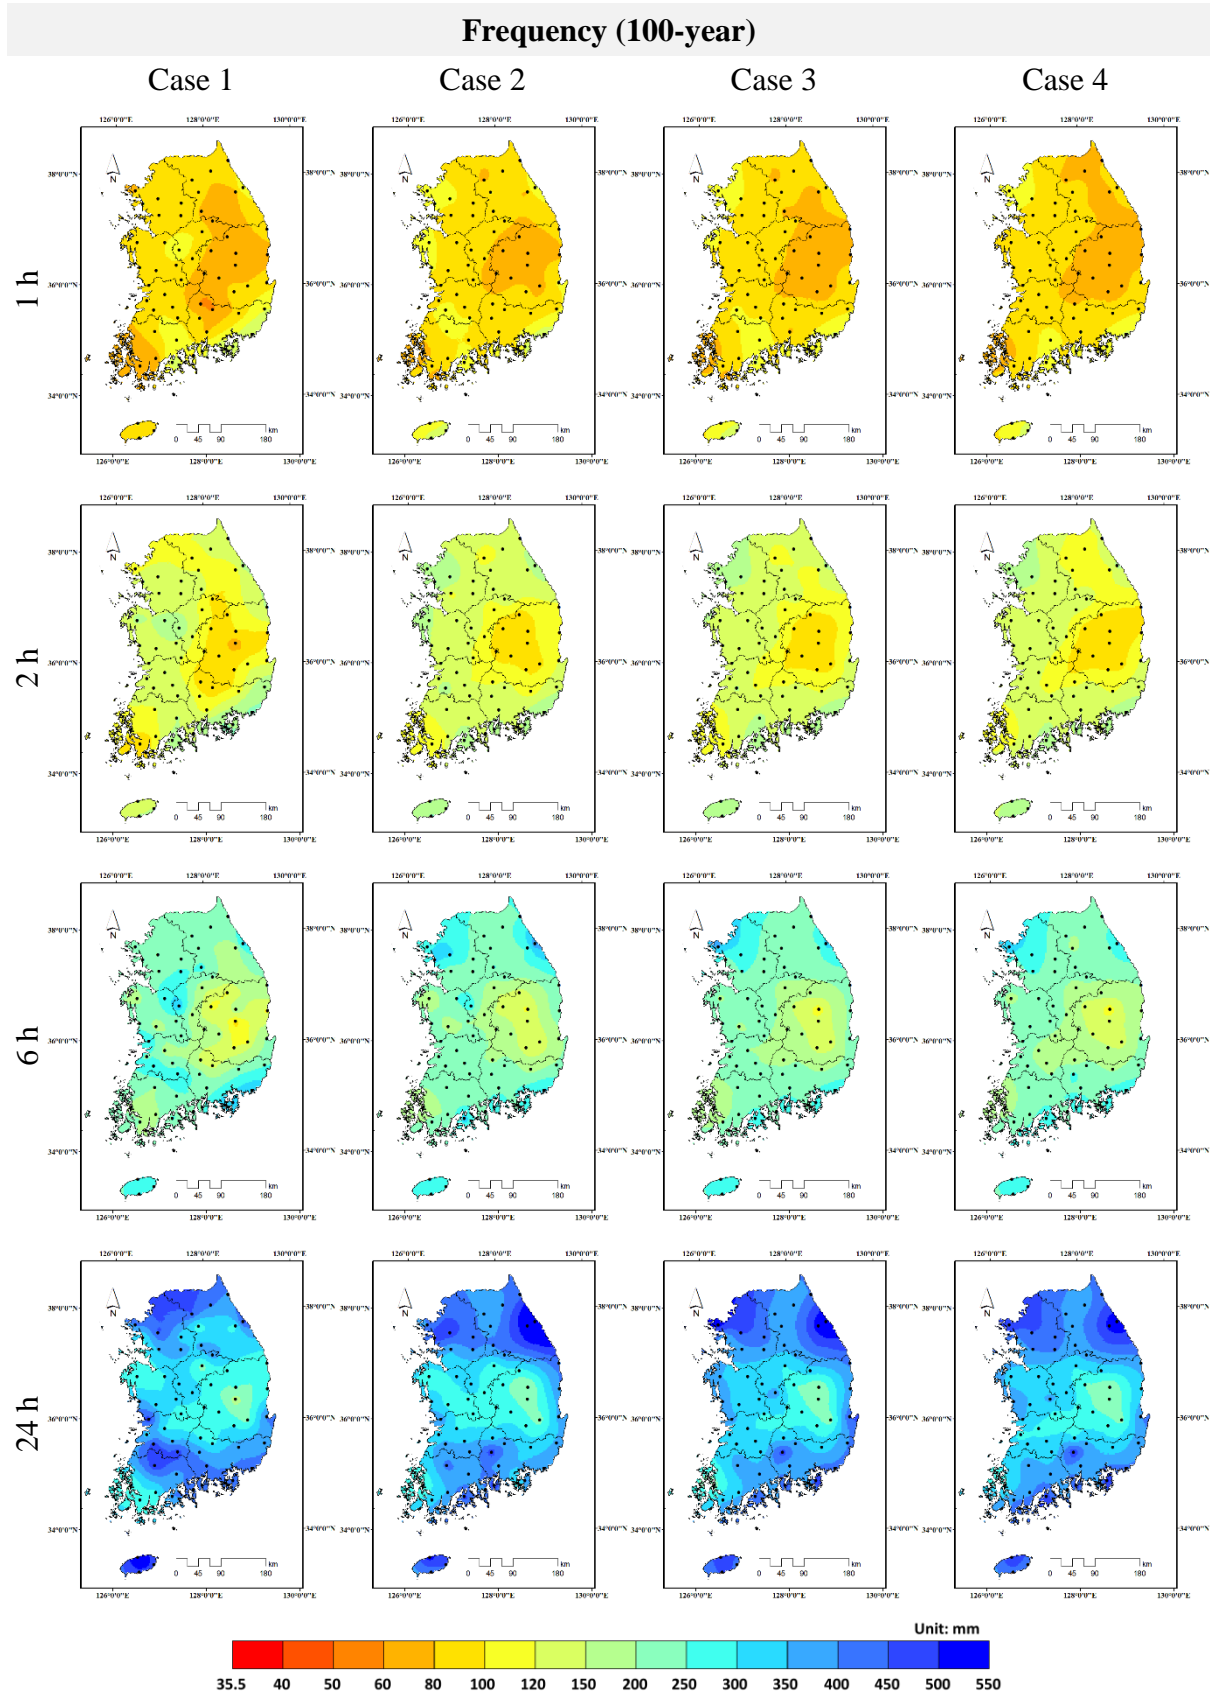

**Figure S8.** Spatial distribution of the 100 year return period based on different durations and observed rainfall periods.

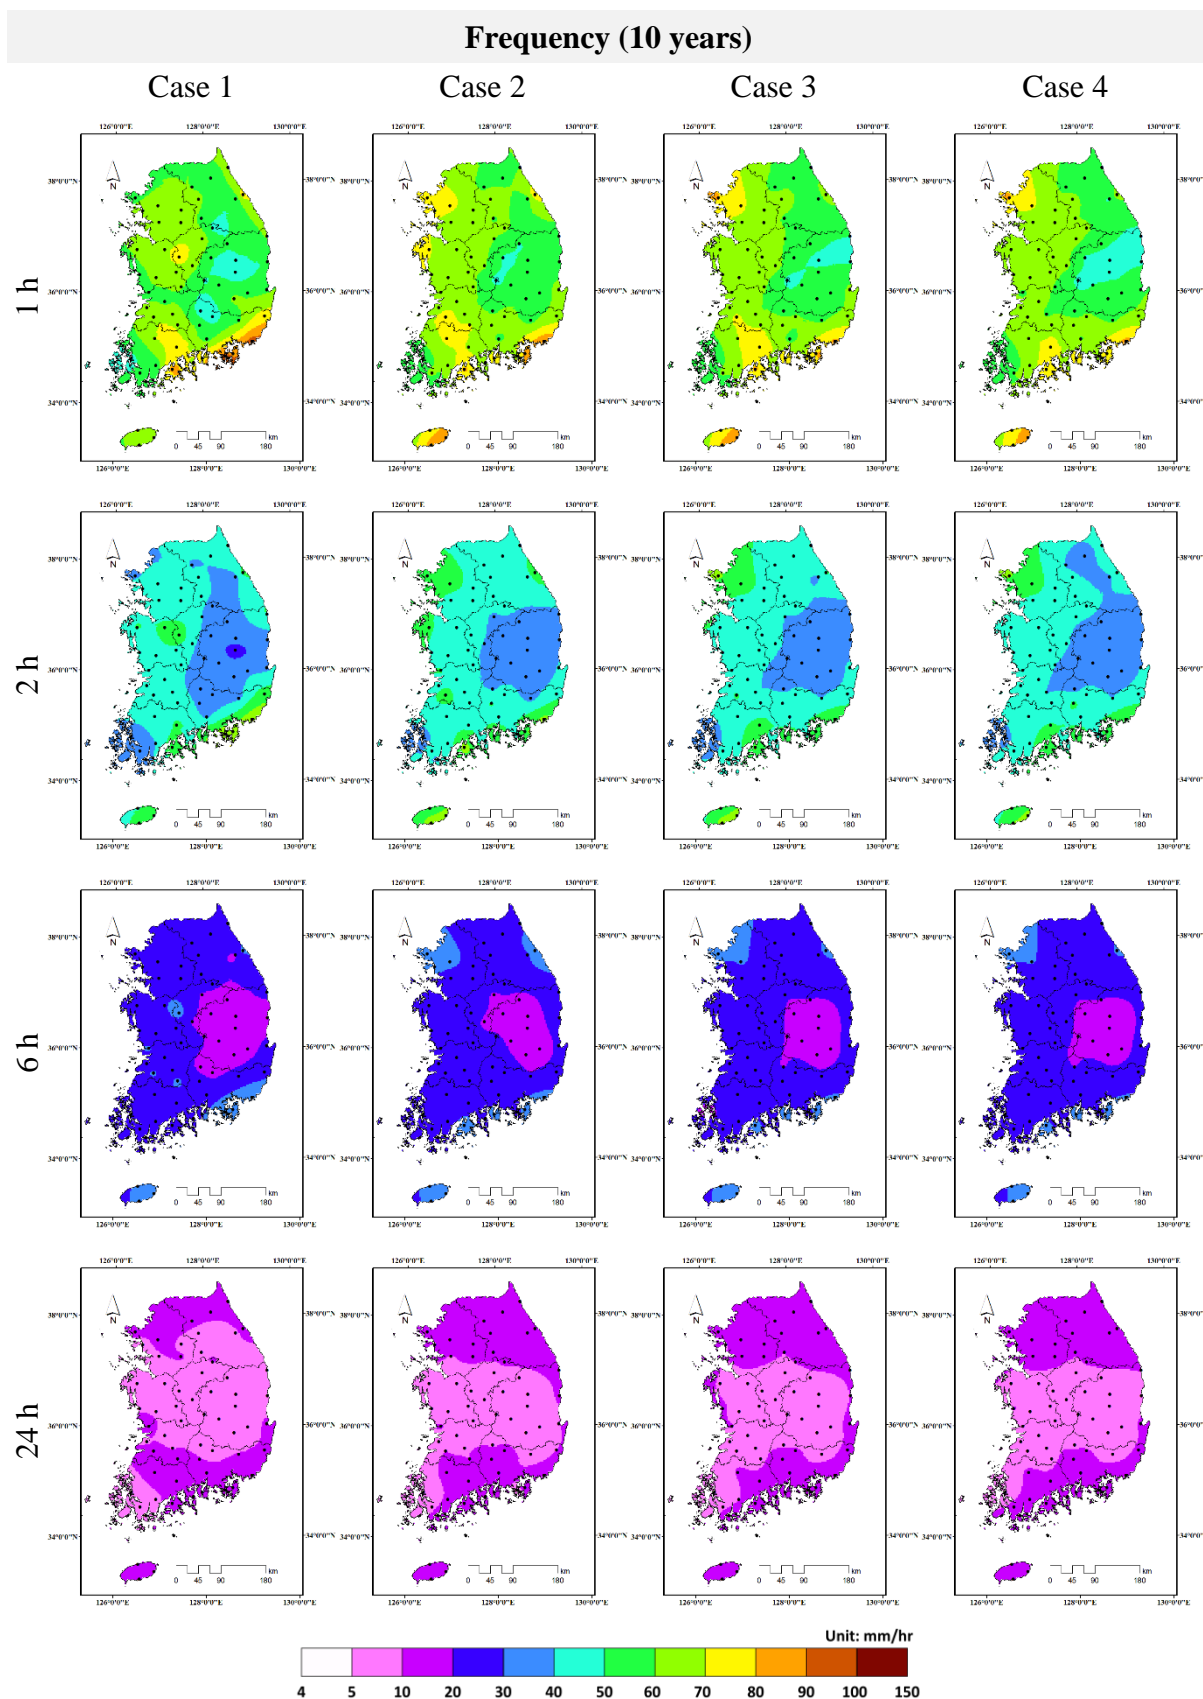

**Figure S9.** Spatial distribution of the rainfall intensity for a 10 year return period based on different durations and observed rainfall periods.

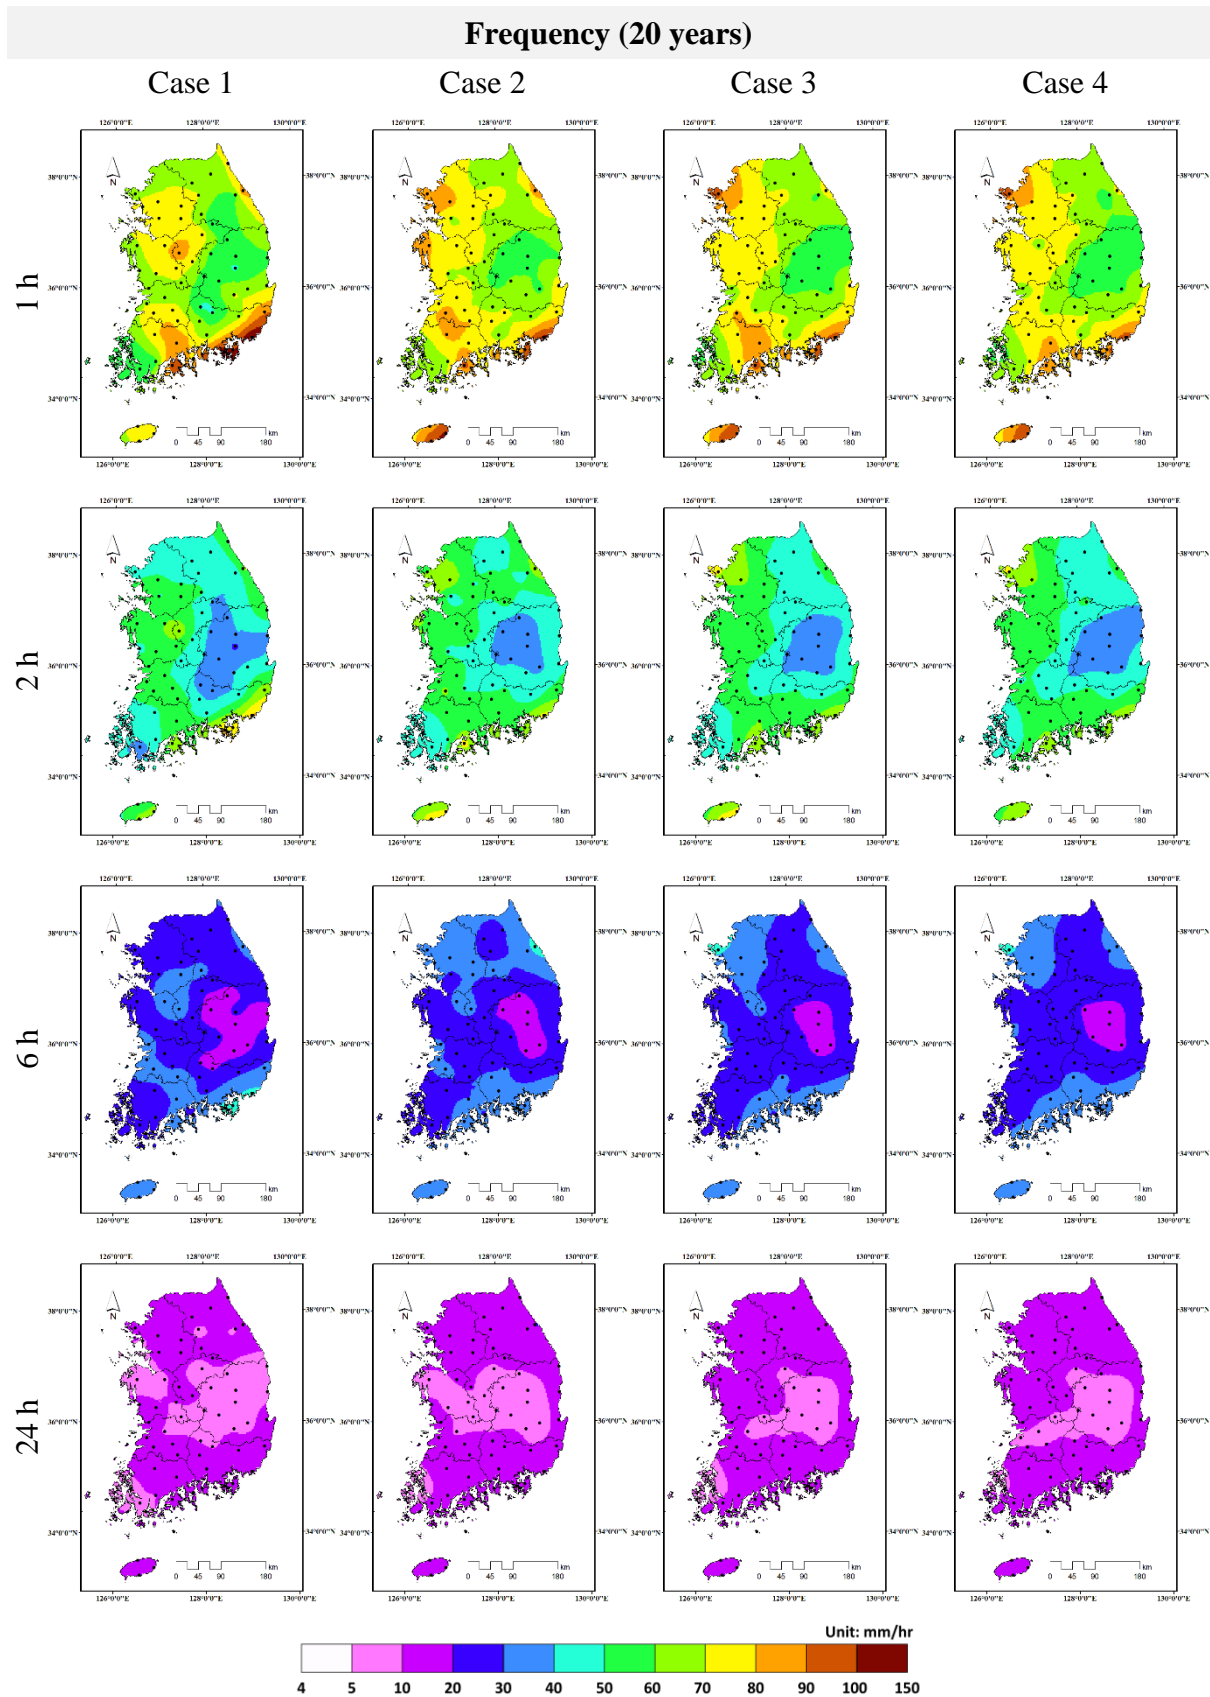

**Figure S10.** Spatial distribution of the rainfall intensity for a 20 year return period based on different durations and observed rainfall periods.

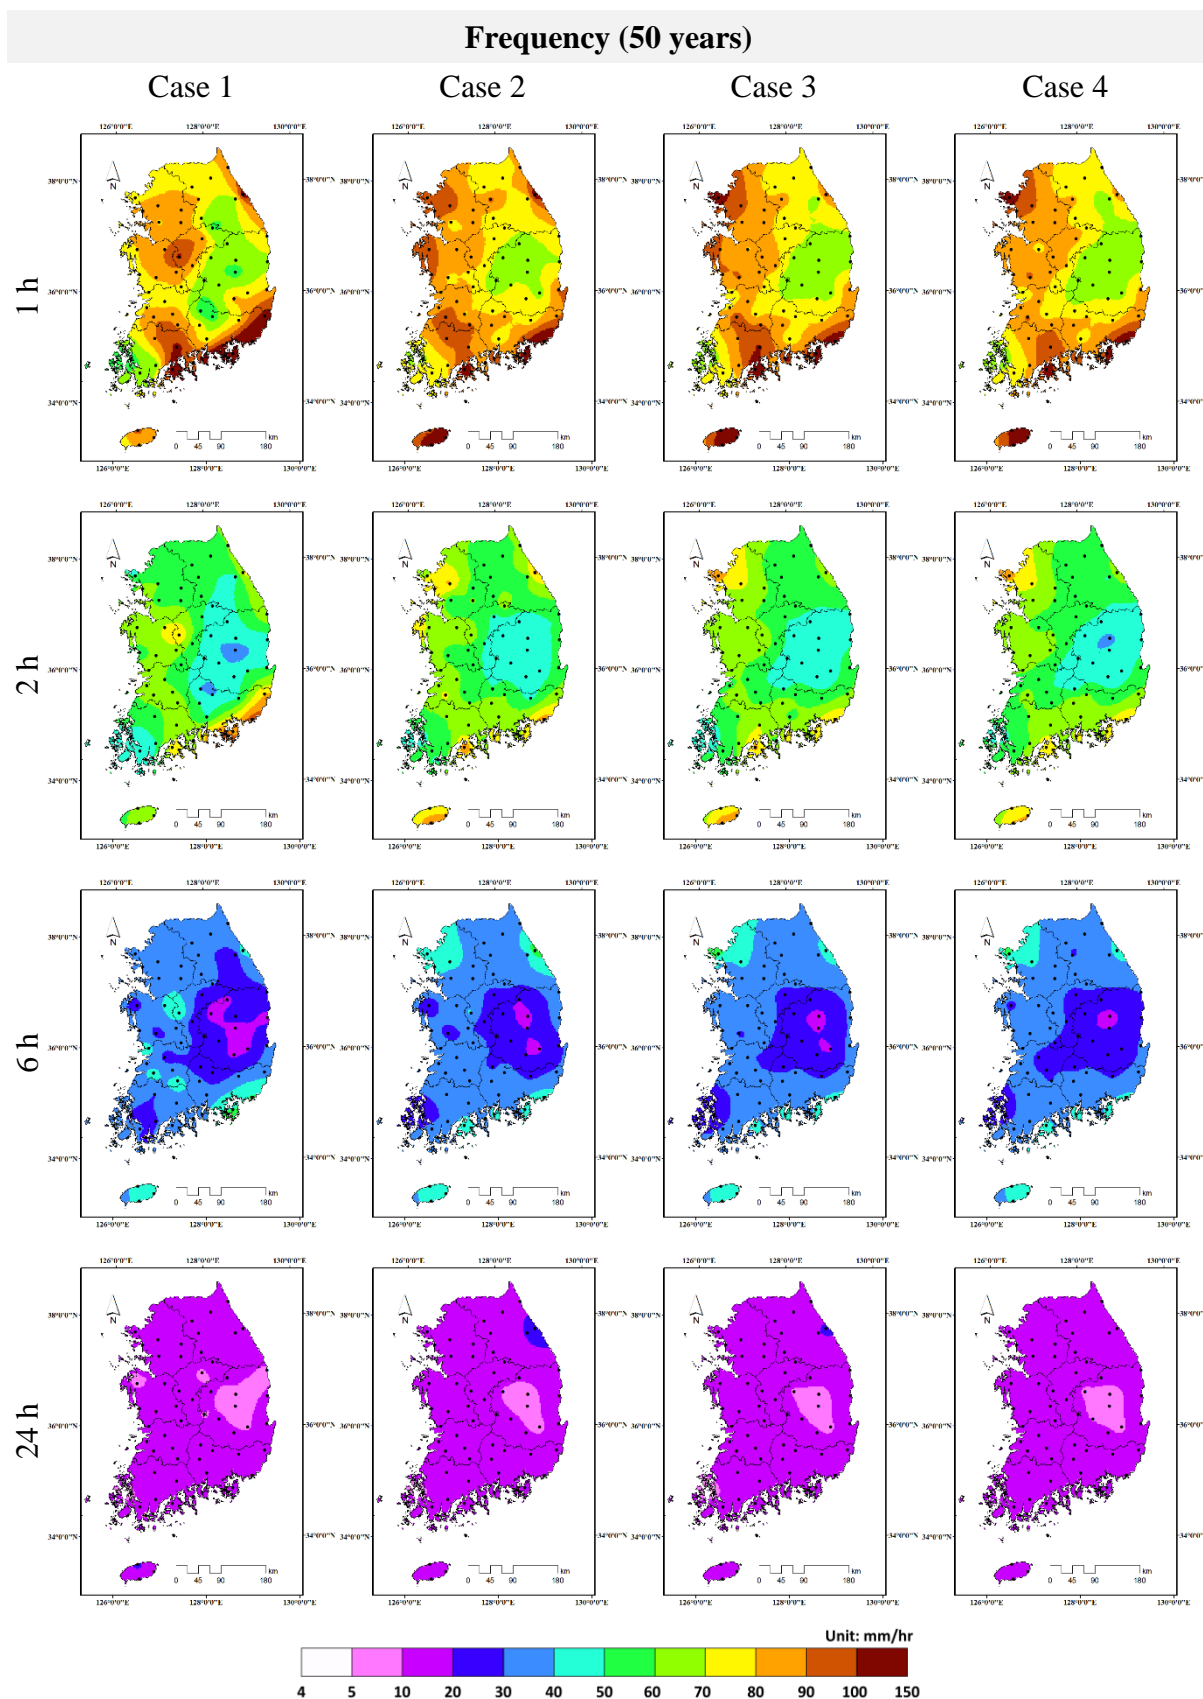

**Figure S11.** Spatial distribution of the rainfall intensity for a 50 year return period based on different durations and observed rainfall periods.

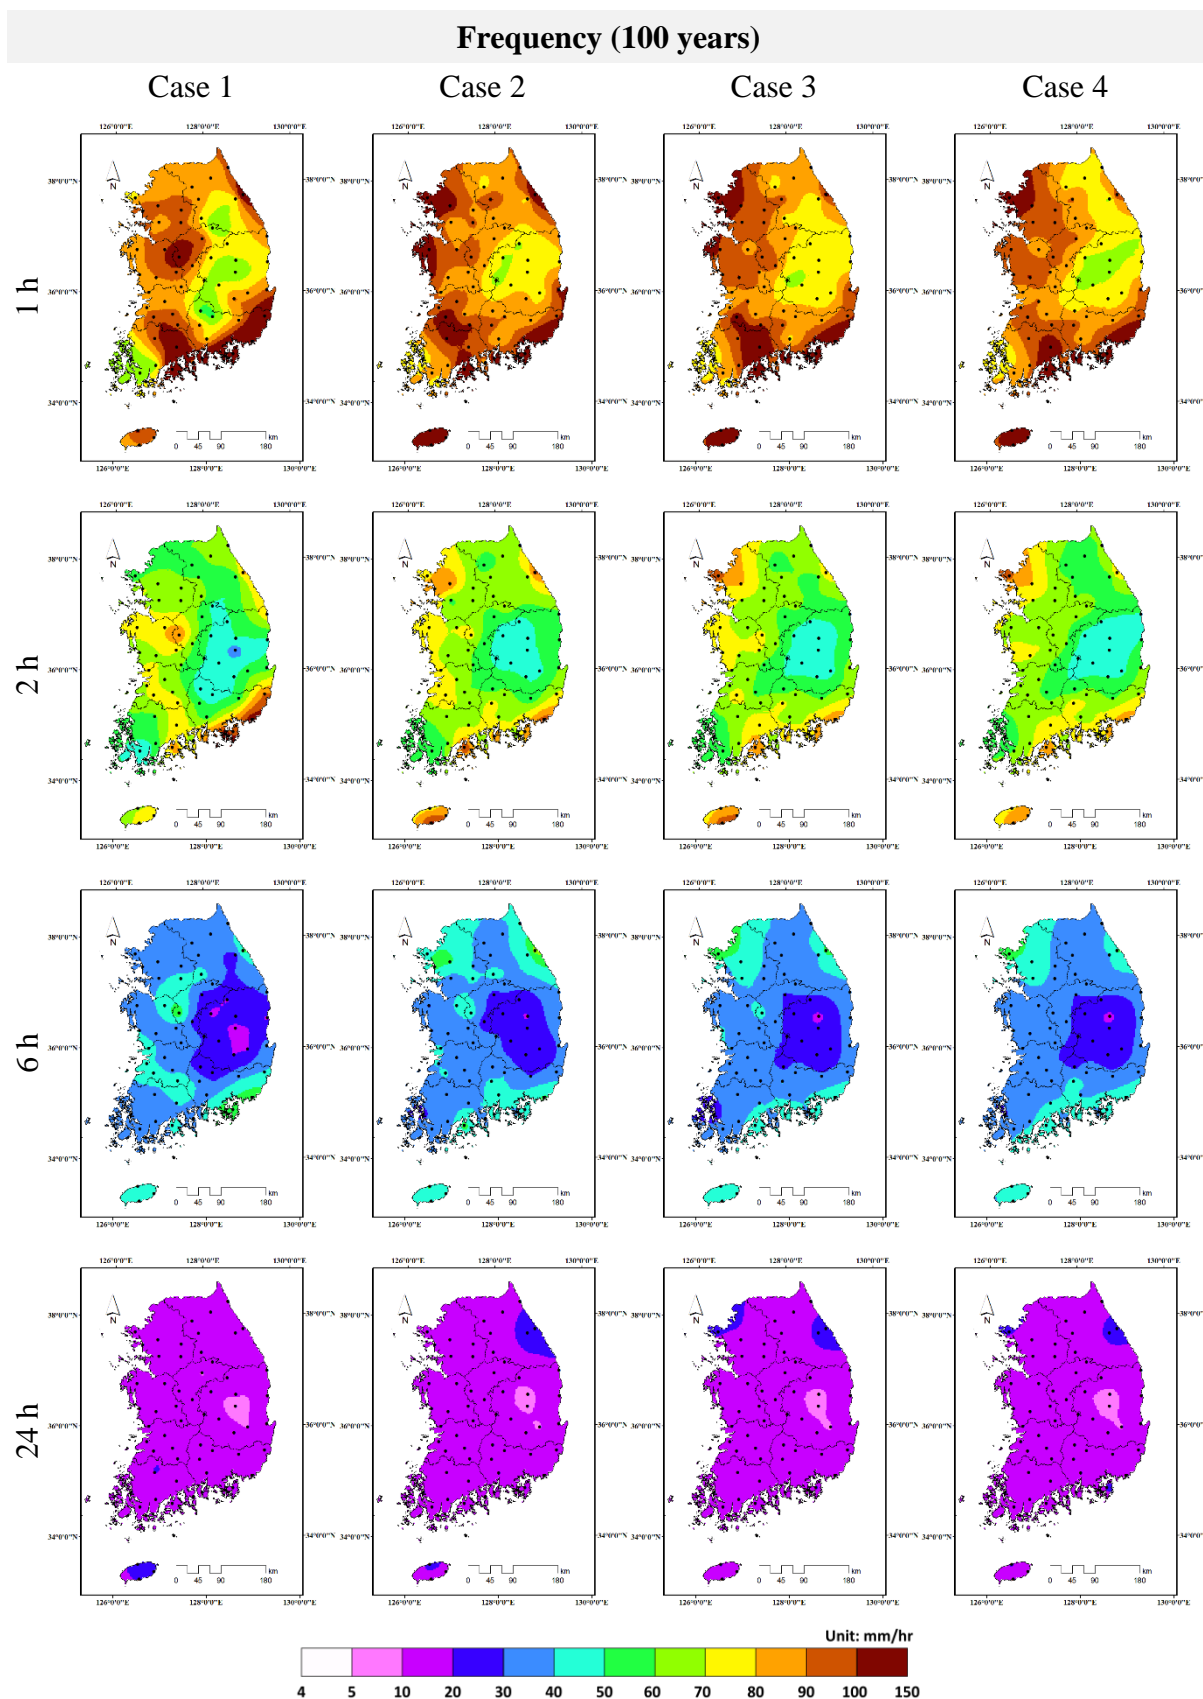

**Figure S12.** Spatial distribution of the rainfall intensity for a 100 year return period based on different durations and observed rainfall periods.

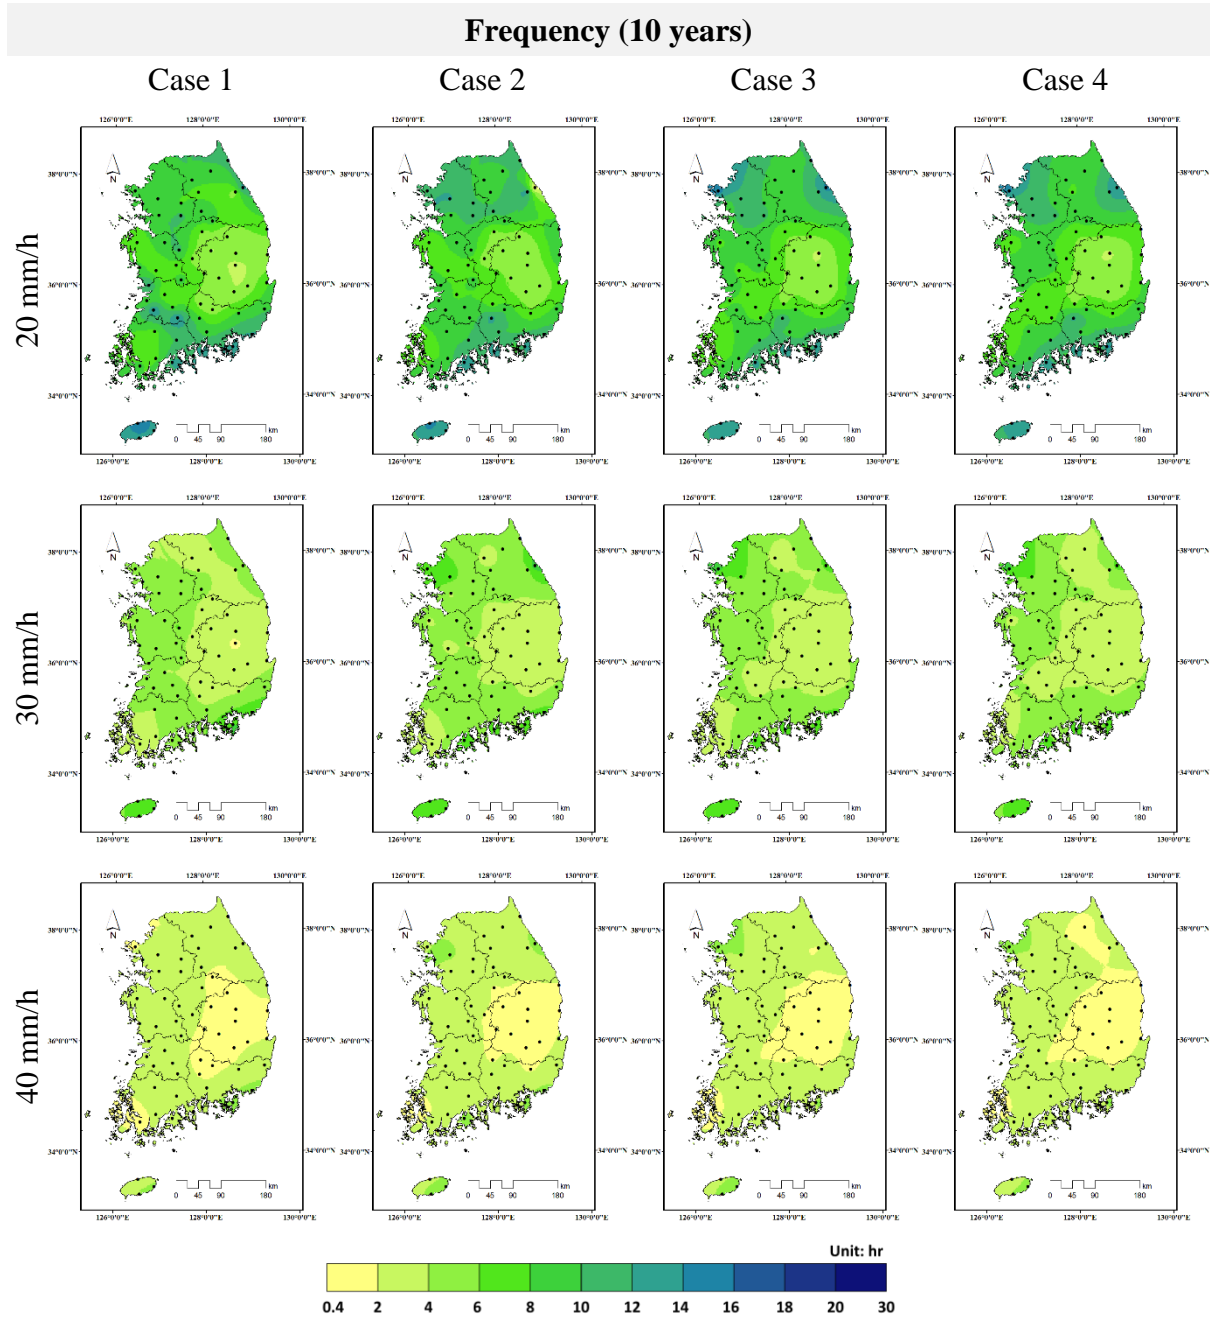

**Figure S13.** Spatial distribution of the rainfall duration for a 10 year return period based on different intensities and observed rainfall periods.

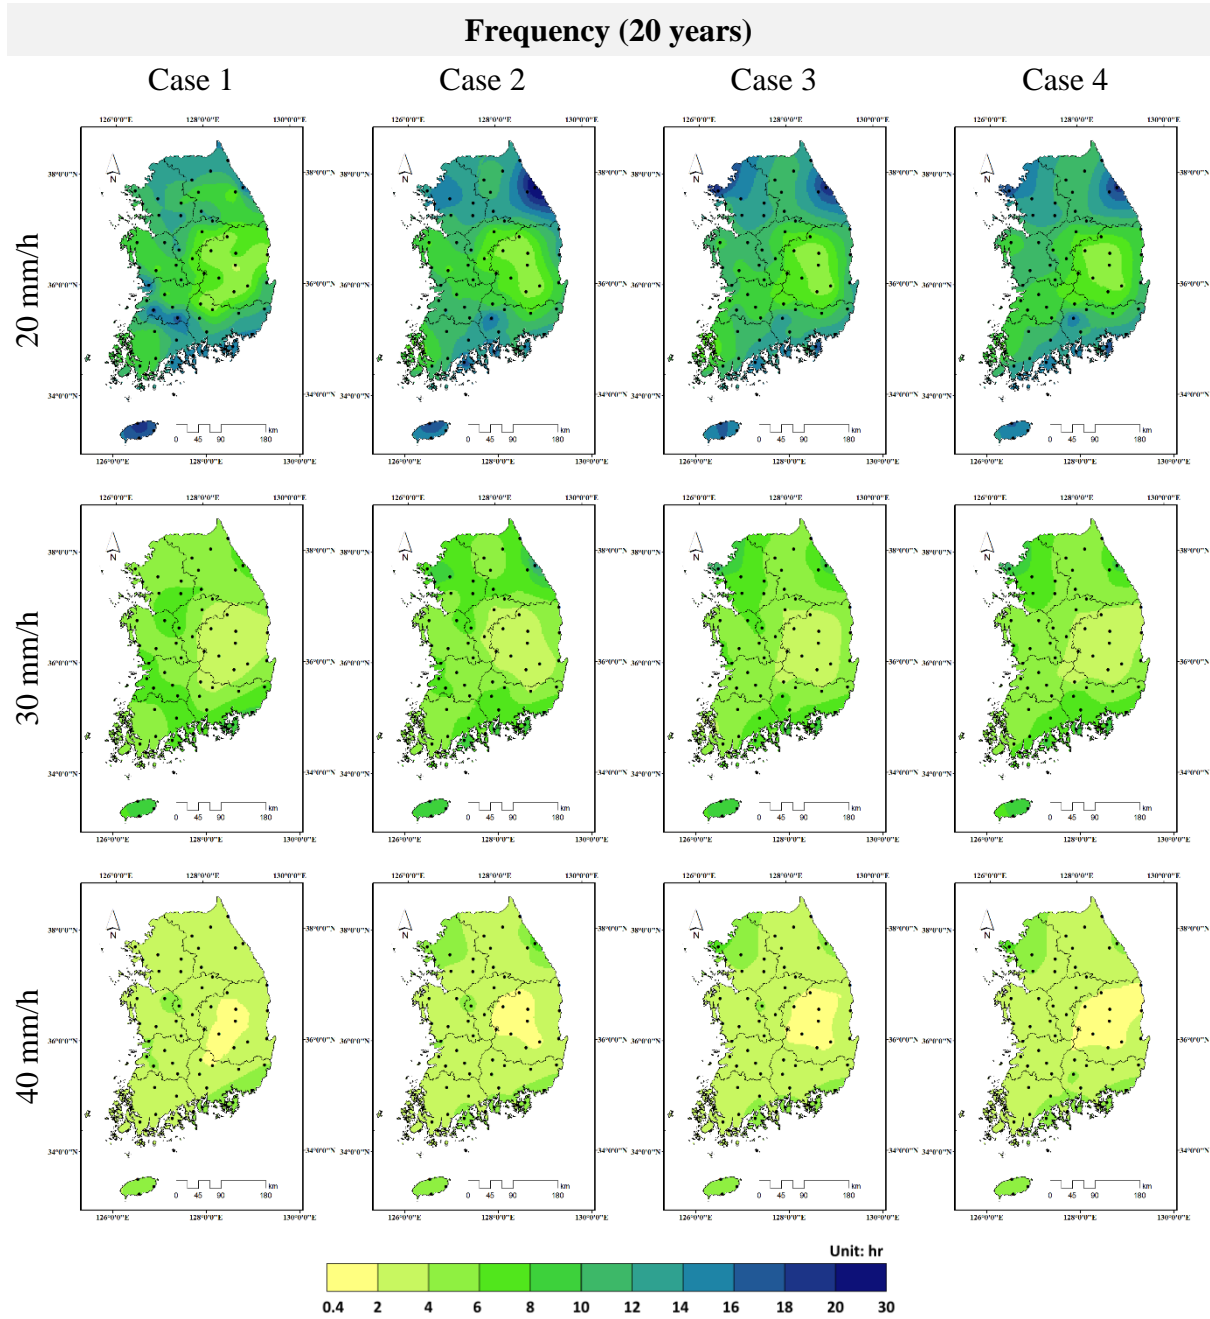

**Figure S14.** Spatial distribution of the rainfall duration for a 20 year return period based on different intensities and observed rainfall periods.

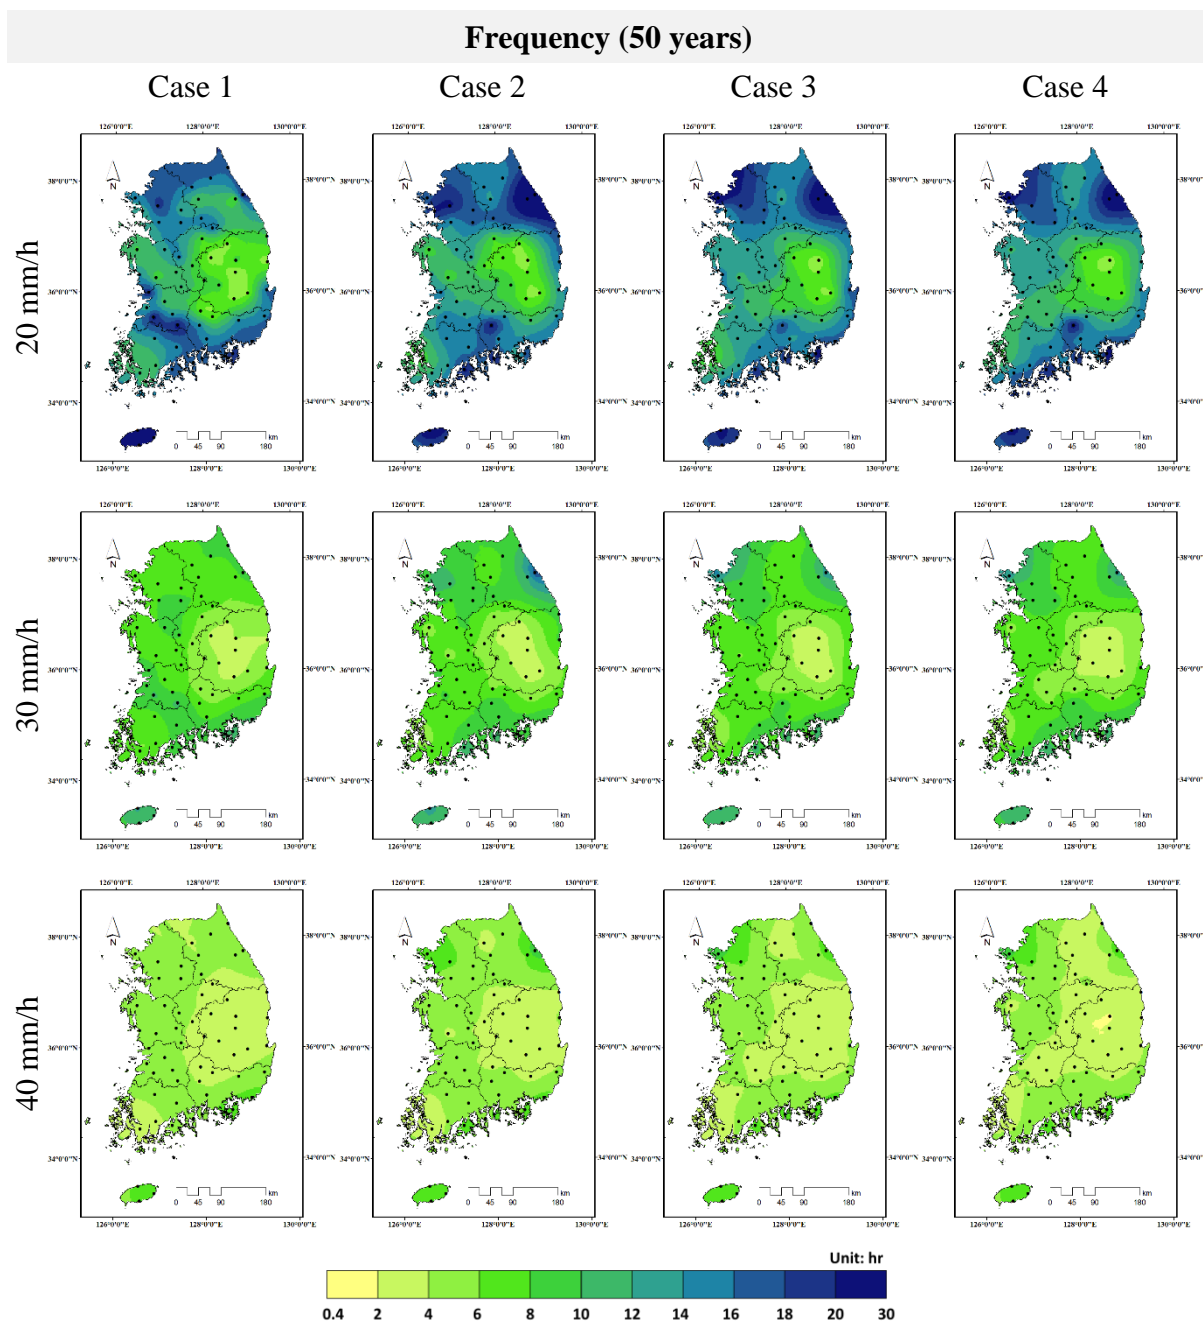

**Figure S15.** Spatial distribution of the rainfall duration for a 50 year return period based on different intensities and observed rainfall periods.



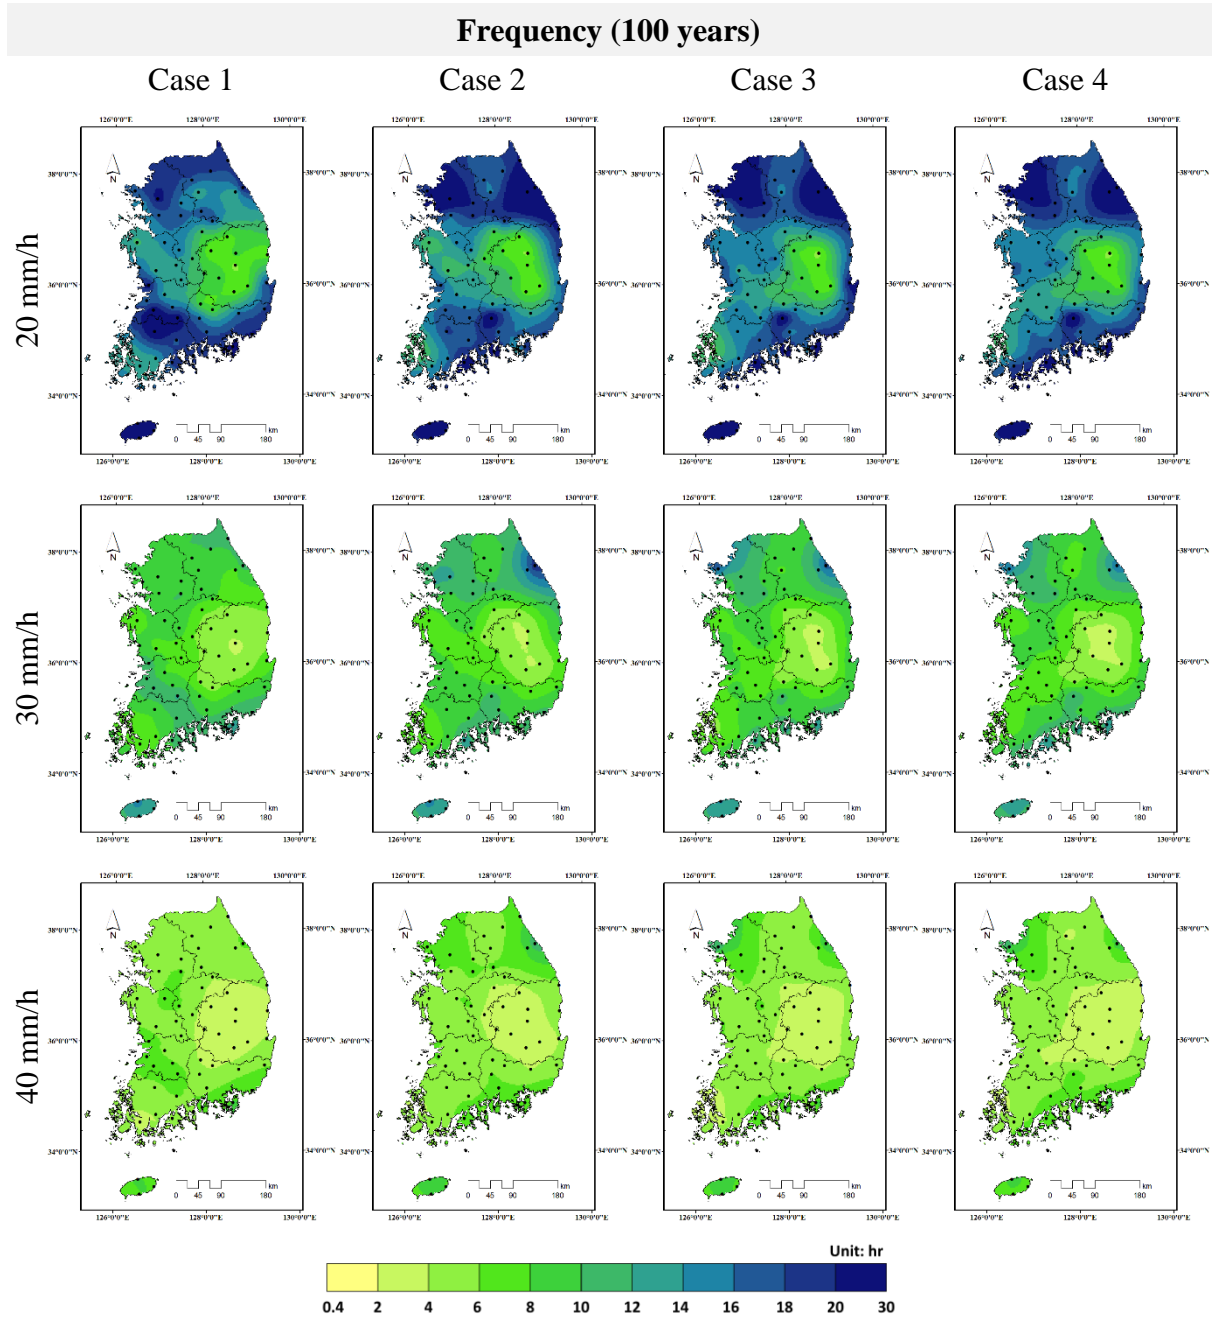

**Figure S16.** Spatial distribution of the rainfall duration for a 100 year return period based on different intensities and observed rainfall periods.
