# Supplementary material for: Spatiotemporal Variability of Regional Rainfall Frequencies in South Korea for Different Periods
Source: MDPI journal article supplement (doi:10.3390/su152416646), 2023-12-07
Supplement: s1 [file s1]

Archive with 1 entries (1 files):
- sustainability-2630547-supplementary.pdf
